# Supplementary material
Source: PubMed Central journal article supplement (PMC7116712)
Supplement: EMS114604-supplement-Supplementary_table_1.pdf [file EMS114604-supplement-Supplementary_table_1.pdf]

| A           | B             | Neither | A Not B | B Not A | Both | Log2 Odds Ratio | p-Value | q-Value | Tendency           |
|-------------|---------------|---------|---------|---------|------|-----------------|---------|---------|--------------------|
| <i>TP53</i> | <i>CTNNB1</i> | 476     | 246     | 233     | 58   | -1.054          | <0.001  | <0.001  | Mutual exclusivity |
| <i>TP53</i> | <i>APC</i>    | 680     | 302     | 29      | 2    | -2.687          | 0.001   | 0.003   | Mutual exclusivity |
| <i>TP53</i> | <i>AXIN1</i>  | 654     | 283     | 55      | 21   | -0.181          | 0.372   | 0.461   | Mutual exclusivity |
| <i>TP53</i> | <i>AXIN2</i>  | 694     | 293     | 15      | 11   | 0.797           | 0.123   | 0.204   | Co-occurrence      |

**Supplementary Table 1.** cBioPortal mutual exclusivity analysis of *TP53* (n = 308) and WNT activating genes (*CTNNB1*: n = 305; *APC*: n = 33; *AXIN1*: n = 74; *AXIN2*: n = 10) in 1089 hepatocellular carcinoma samples from 1085 patients, Fisher's exact test. *P*-value for each comparison is specified in the table above.
